# Supplementary material for: Yellow perch genetic structure and habitat use among connected habitats in eastern Lake Michigan
Source: PubMed Central journal article supplement (PMC6706189; doi:10.1002/ece3.5219), 2019-07-23
Supplement: ECE3-9-8922-s001.pdf [file ECE3-9-8922-s001.pdf]

### Supporting Tables

**Supplemental Table S1.** Summary of PCR parameters and locus statistics for 14 microsatellite

loci.

| <b>Loci</b>    | Num.<br>Genotyped | Num.<br>Alleles | Obsvd.<br>Heterozygosity | Expt.<br>Heterozygosity | Annealing<br>Temp. (°C) | Cycles          | Source                    | Dye-<br>Label |
|----------------|-------------------|-----------------|--------------------------|-------------------------|-------------------------|-----------------|---------------------------|---------------|
| <b>Mpf.4</b>   | 956               | 29              | 0.77                     | 0.78                    | 54                      | 35              | Gryzbowski et al.<br>2010 | FAM           |
| <b>Mpf.5</b>   | 973               | 14              | 0.55                     | 0.56                    | 54                      | 35              | Gryzbowski et al.<br>2010 | FAM           |
| <b>Mpf.6</b>   | 958               | 10              | 0.54                     | 0.55                    | 54                      | 35              | Gryzbowski et al.<br>2010 | VIC           |
| <b>Mpf.7</b>   | 968               | 30              | 0.86                     | 0.88                    | 54                      | 35              | Gryzbowski et al.<br>2010 | VIC           |
| <b>Pfla.L2</b> | 944               | 15              | 0.53                     | 0.56                    | 51                      | 35              | Leclerc et al. 2000       | PET           |
| <b>Pfla.L5</b> | 963               | 14              | 0.48                     | 0.49                    | 51                      | 35              | Leclerc et al. 2000       | VIC           |
| <b>Pfla.L6</b> | 920               | 18              | 0.46                     | 0.49                    | 47                      | 40              | Leclerc et al. 2000       | FAM           |
| <b>Svi.33</b>  | 901               | 46              | 0.91                     | 0.96                    | 61                      | 35              | Borer et al. 1999         | NED           |
| <b>Svi.4</b>   | 958               | 30              | 0.94                     | 0.88                    | 61                      | 35              | Borer et al. 1999         | FAM           |
| <b>Svi.6</b>   | 916               | 41              | 0.79                     | 0.91                    | TD (65,55)              | 10@65,<br>30@55 | Borer et al. 1999         | VIC           |
| <b>YP41</b>    | 956               | 8               | 0.54                     | 0.54                    | 54                      | 35              | Li et al. 2006            | FAM           |
| <b>YP60</b>    | 962               | 9               | 0.31                     | 0.31                    | 51                      | 35              | Li et al. 2006            | FAM           |
| <b>YP78</b>    | 956               | 14              | 0.52                     | 0.52                    | 54                      | 35              | Li et al. 2006            | NED           |
| <b>YP96</b>    | 963               | 8               | 0.19                     | 0.20                    | 51                      | 35              | Li et al. 2006            | VIC           |

**Supplemental Table S2.** Summary of population differentiation statistics by sampling location.

| <b>Strata</b>  | <b><i>n</i></b> | <b>Avg. Samples<br/>Missing Data</b> | <b>Avg.<br/>Alleles/Locus</b> | <b>Num. Private<br/>Alleles</b> | <b>Heterozygosity</b> |
|----------------|-----------------|--------------------------------------|-------------------------------|---------------------------------|-----------------------|
| Arcadia        | 80              | 0.3571                               | 13.43                         | 4                               | 0.608                 |
| Betsie         | 55              | 0.6429                               | 11.64                         | 1                               | 0.621                 |
| Charlevoix     | 39              | 0.0714                               | 9.79                          | 2                               | 0.599                 |
| LK MI North    | 47              | 7.6429                               | 9.64                          | 1                               | 0.528                 |
| LK MI South    | 60              | 0.5                                  | 9.93                          | 0                               | 0.57                  |
| Macatawa       | 58              | 1.6429                               | 11.64                         | 3                               | 0.596                 |
| Manistee       | 80              | 0.2857                               | 12.21                         | 3                               | 0.624                 |
| Muskegon       | 84              | 3                                    | 14.29                         | 7                               | 0.65                  |
| Muskegon Deep  | 72              | 3.0714                               | 11.64                         | 2                               | 0.558                 |
| Pentwater      | 80              | 0.9286                               | 11.43                         | 3                               | 0.618                 |
| Pentwater Deep | 48              | 1.6429                               | 10.43                         | 4                               | 0.55                  |
| Pere Marquette | 80              | 1.5714                               | 12                            | 3                               | 0.578                 |
| Portage        | 45              | 1                                    | 11.36                         | 0                               | 0.63                  |
| White          | 80              | 0.3571                               | 13.43                         | 5                               | 0.636                 |
| White Deep     | 67              | 2.7143                               | 11.86                         | 2                               | 0.567                 |

**Supplemental Table S3.** Loadings on each axis of DAPC plot (Fig. 3) by each allele at each locus.

| <b>Locus.Allele</b> | <b>LD1</b> | <b>LD2</b> |
|---------------------|------------|------------|
| YP41.184            | 0.0006     | 0.0043     |
| YP41.180            | 0.0025     | 0.0074     |
| YP41.172            | 0.0000     | 0.0001     |
| YP41.188            | 0.0002     | 0.0122     |
| YP41.176            | 0.0043     | 0.0019     |
| YP41.193            | 0.0000     | 0.0006     |
| YP41.-9             | 0.0021     | 0.0727     |
| YP41.168            | 0.0000     | 0.0000     |
| YP41.197            | 0.0001     | 0.0000     |
| YP78.202            | 0.0002     | 0.0017     |
| YP78.217            | 0.0005     | 0.0000     |
| YP78.214            | 0.0000     | 0.0031     |
| YP78.211            | 0.0005     | 0.0005     |
| YP78.220            | 0.0154     | 0.0004     |
| YP78.205            | 0.0007     | 0.0002     |
| YP78.208            | 0.0119     | 0.0070     |
| YP78.196            | 0.0084     | 0.0138     |
| YP78.190            | 0.0007     | 0.0009     |
| YP78.193            | 0.0002     | 0.0004     |
| YP78.199            | 0.0000     | 0.0029     |
| YP78.223            | 0.0001     | 0.0004     |
| YP78.-9             | 0.0169     | 0.0003     |
| YP78.187            | 0.0018     | 0.0000     |
| YP78.181            | 0.0000     | 0.0000     |
| Mpf_5.158           | 0.0006     | 0.0004     |
| Mpf_5.147           | 0.0001     | 0.0033     |
| Mpf_5.156           | 0.0032     | 0.0010     |
| Mpf_5.160           | 0.0000     | 0.0067     |
| Mpf_5.164           | 0.0000     | 0.0001     |
| Mpf_5.152           | 0.0084     | 0.0110     |
| Mpf_5.162           | 0.0007     | 0.0004     |
| Mpf_5.145           | 0.0001     | 0.0000     |
| Mpf_5.150           | 0.0006     | 0.0002     |
| Mpf_5.143           | 0.0008     | 0.0002     |

|           |        |        |
|-----------|--------|--------|
| Mpf_5.154 | 0.0091 | 0.0001 |
| Mpf_5.170 | 0.0001 | 0.0000 |
| Mpf_5.166 | 0.0000 | 0.0000 |
| Mpf_5.-9  | 0.0000 | 0.0007 |
| Mpf_5.140 | 0.0001 | 0.0000 |
| Mpf_7.170 | 0.0267 | 0.0006 |
| Mpf_7.186 | 0.0339 | 0.0005 |
| Mpf_7.176 | 0.0198 | 0.0096 |
| Mpf_7.172 | 0.0328 | 0.0028 |
| Mpf_7.182 | 0.0027 | 0.0046 |
| Mpf_7.184 | 0.0185 | 0.0013 |
| Mpf_7.206 | 0.0000 | 0.0000 |
| Mpf_7.178 | 0.0066 | 0.0390 |
| Mpf_7.188 | 0.0001 | 0.0179 |
| Mpf_7.168 | 0.0091 | 0.0000 |
| Mpf_7.192 | 0.0005 | 0.0000 |
| Mpf_7.180 | 0.0073 | 0.0059 |
| Mpf_7.196 | 0.0000 | 0.0000 |
| Mpf_7.190 | 0.0000 | 0.0000 |
| Mpf_7.160 | 0.0001 | 0.0007 |
| Mpf_7.174 | 0.0004 | 0.0285 |
| Mpf_7.194 | 0.0000 | 0.0001 |
| Mpf_7.147 | 0.0145 | 0.0000 |
| Mpf_7.142 | 0.0000 | 0.0000 |
| Mpf_7.166 | 0.0002 | 0.0002 |
| Mpf_7.156 | 0.0000 | 0.0000 |
| Mpf_7.198 | 0.0000 | 0.0001 |
| Mpf_7.200 | 0.0000 | 0.0000 |
| Mpf_7.140 | 0.0001 | 0.0000 |
| Mpf_7.162 | 0.0002 | 0.0000 |
| Mpf_7.158 | 0.0000 | 0.0000 |
| Mpf_7.164 | 0.0000 | 0.0000 |
| Mpf_7.202 | 0.0000 | 0.0000 |
| Mpf_7.150 | 0.0000 | 0.0000 |
| Mpf_7.-9  | 0.0003 | 0.0004 |
| Mpf_7.152 | 0.0000 | 0.0002 |
| YP60.197  | 0.0015 | 0.0006 |
| YP60.201  | 0.0022 | 0.0010 |

|             |        |        |
|-------------|--------|--------|
| YP60.189    | 0.0014 | 0.0050 |
| YP60.204    | 0.0017 | 0.0001 |
| YP60.193    | 0.0001 | 0.0090 |
| YP60.186    | 0.0000 | 0.0001 |
| YP60.208    | 0.0002 | 0.0003 |
| YP60.-9     | 0.0000 | 0.0009 |
| YP60.216    | 0.0003 | 0.0000 |
| YP60.183    | 0.0000 | 0.0000 |
| YP96.133    | 0.0084 | 0.0039 |
| YP96.136    | 0.0000 | 0.0201 |
| YP96.130    | 0.0058 | 0.0050 |
| YP96.143    | 0.0001 | 0.0001 |
| YP96.146    | 0.0000 | 0.0004 |
| YP96.139    | 0.0010 | 0.0096 |
| YP96.149    | 0.0000 | 0.0022 |
| YP96.-9     | 0.0001 | 0.0009 |
| YP96.152    | 0.0000 | 0.0001 |
| Pfla_L2.210 | 0.0048 | 0.0003 |
| Pfla_L2.213 | 0.0080 | 0.0080 |
| Pfla_L2.215 | 0.0000 | 0.0018 |
| Pfla_L2.212 | 0.0175 | 0.0127 |
| Pfla_L2.202 | 0.0009 | 0.0008 |
| Pfla_L2.208 | 0.0000 | 0.0006 |
| Pfla_L2.204 | 0.0085 | 0.0125 |
| Pfla_L2.219 | 0.0026 | 0.0001 |
| Pfla_L2.217 | 0.0000 | 0.0005 |
| Pfla_L2.-9  | 0.0026 | 0.0184 |
| Pfla_L2.223 | 0.0000 | 0.0000 |
| Pfla_L2.225 | 0.0001 | 0.0000 |
| Pfla_L2.206 | 0.0000 | 0.0001 |
| Pfla_L2.245 | 0.0000 | 0.0000 |
| Pfla_L2.221 | 0.0000 | 0.0000 |
| Pfla_L2.230 | 0.0000 | 0.0000 |
| Pfla_L5.152 | 0.0044 | 0.0028 |
| Pfla_L5.154 | 0.0150 | 0.0014 |
| Pfla_L5.171 | 0.0000 | 0.0000 |
| Pfla_L5.156 | 0.0070 | 0.0013 |
| Pfla_L5.148 | 0.0141 | 0.0000 |

|             |        |        |
|-------------|--------|--------|
| Pfla_L5.132 | 0.0038 | 0.0000 |
| Pfla_L5.-9  | 0.0022 | 0.0029 |
| Pfla_L5.159 | 0.0001 | 0.0000 |
| Pfla_L5.150 | 0.0018 | 0.0001 |
| Pfla_L5.140 | 0.0000 | 0.0001 |
| Pfla_L5.145 | 0.0000 | 0.0000 |
| Pfla_L5.163 | 0.0000 | 0.0000 |
| Pfla_L5.136 | 0.0000 | 0.0000 |
| Pfla_L5.161 | 0.0000 | 0.0000 |
| Pfla_L5.168 | 0.0000 | 0.0001 |
| Pfla_L6.171 | 0.0043 | 0.0032 |
| Pfla_L6.173 | 0.0129 | 0.0001 |
| Pfla_L6.165 | 0.0006 | 0.0279 |
| Pfla_L6.169 | 0.0002 | 0.0001 |
| Pfla_L6.175 | 0.0000 | 0.0001 |
| Pfla_L6.163 | 0.0016 | 0.0052 |
| Pfla_L6.158 | 0.0001 | 0.0005 |
| Pfla_L6.152 | 0.0001 | 0.0004 |
| Pfla_L6.156 | 0.0056 | 0.0024 |
| Pfla_L6.-9  | 0.0463 | 0.0054 |
| Pfla_L6.154 | 0.0026 | 0.0006 |
| Pfla_L6.167 | 0.0001 | 0.0002 |
| Pfla_L6.160 | 0.0000 | 0.0004 |
| Pfla_L6.177 | 0.0000 | 0.0007 |
| Pfla_L6.140 | 0.0001 | 0.0000 |
| Pfla_L6.181 | 0.0000 | 0.0002 |
| Pfla_L6.179 | 0.0000 | 0.0000 |
| Pfla_L6.132 | 0.0000 | 0.0000 |
| Pfla_L6.147 | 0.0000 | 0.0001 |
| Svi_4.152   | 0.0006 | 0.0034 |
| Svi_4.159   | 0.0124 | 0.0005 |
| Svi_4.156   | 0.0048 | 0.0012 |
| Svi_4.165   | 0.0009 | 0.0043 |
| Svi_4.154   | 0.0145 | 0.0003 |
| Svi_4.134   | 0.0000 | 0.0005 |
| Svi_4.161   | 0.0080 | 0.0180 |
| Svi_4.171   | 0.0010 | 0.0029 |
| Svi_4.163   | 0.0001 | 0.0000 |

|            |        |        |
|------------|--------|--------|
| Svi_4.138  | 0.0000 | 0.0000 |
| Svi_4.167  | 0.0001 | 0.0426 |
| Svi_4.174  | 0.0000 | 0.0015 |
| Svi_4.169  | 0.0003 | 0.0110 |
| Svi_4.180  | 0.0000 | 0.0001 |
| Svi_4.111  | 0.0080 | 0.0060 |
| Svi_4.-9   | 0.0038 | 0.0525 |
| Svi_4.145  | 0.0009 | 0.0188 |
| Svi_4.148  | 0.0005 | 0.0002 |
| Svi_4.176  | 0.0453 | 0.0490 |
| Svi_4.115  | 0.0166 | 0.0009 |
| Svi_4.140  | 0.0001 | 0.0000 |
| Svi_4.184  | 0.0000 | 0.0000 |
| Svi_4.150  | 0.0066 | 0.0128 |
| Svi_4.143  | 0.0004 | 0.0002 |
| Svi_4.136  | 0.0002 | 0.0000 |
| Svi_4.178  | 0.0000 | 0.0001 |
| Svi_4.182  | 0.0000 | 0.0000 |
| Svi_4.130  | 0.0000 | 0.0000 |
| Svi_4.121  | 0.0000 | 0.0001 |
| Svi_4.113  | 0.0001 | 0.0000 |
| Svi_4.132  | 0.0000 | 0.0000 |
| Svi_33.144 | 0.0016 | 0.0027 |
| Svi_33.148 | 0.0003 | 0.0044 |
| Svi_33.125 | 0.0000 | 0.0001 |
| Svi_33.129 | 0.0031 | 0.0177 |
| Svi_33.137 | 0.0064 | 0.0010 |
| Svi_33.139 | 0.0007 | 0.0153 |
| Svi_33.150 | 0.0004 | 0.0451 |
| Svi_33.172 | 0.0013 | 0.0001 |
| Svi_33.112 | 0.0029 | 0.0011 |
| Svi_33.154 | 0.0054 | 0.0057 |
| Svi_33.133 | 0.0000 | 0.0029 |
| Svi_33.152 | 0.0013 | 0.0000 |
| Svi_33.122 | 0.0009 | 0.0089 |
| Svi_33.142 | 0.0000 | 0.0003 |
| Svi_33.160 | 0.0017 | 0.0049 |
| Svi_33.120 | 0.0014 | 0.0022 |

|            |        |        |
|------------|--------|--------|
| Svi_33.146 | 0.0009 | 0.0005 |
| Svi_33.135 | 0.0025 | 0.0002 |
| Svi_33.158 | 0.0002 | 0.0033 |
| Svi_33.131 | 0.0022 | 0.0001 |
| Svi_33.184 | 0.0000 | 0.0000 |
| Svi_33.110 | 0.0020 | 0.0044 |
| Svi_33.168 | 0.0009 | 0.0050 |
| Svi_33.162 | 0.0050 | 0.0022 |
| Svi_33.166 | 0.0020 | 0.0029 |
| Svi_33.174 | 0.0019 | 0.0000 |
| Svi_33.127 | 0.0001 | 0.0074 |
| Svi_33.170 | 0.0009 | 0.0000 |
| Svi_33.176 | 0.0000 | 0.0000 |
| Svi_33.164 | 0.0002 | 0.0001 |
| Svi_33.116 | 0.0038 | 0.0000 |
| Svi_33.-9  | 0.0002 | 0.0023 |
| Svi_33.186 | 0.0000 | 0.0000 |
| Svi_33.100 | 0.0001 | 0.0000 |
| Svi_33.156 | 0.0004 | 0.0026 |
| Svi_33.104 | 0.0000 | 0.0001 |
| Svi_33.178 | 0.0000 | 0.0000 |
| Svi_33.188 | 0.0000 | 0.0000 |
| Svi_33.124 | 0.0001 | 0.0067 |
| Svi_33.194 | 0.0000 | 0.0000 |
| Svi_33.106 | 0.0001 | 0.0000 |
| Svi_33.182 | 0.0000 | 0.0000 |
| Svi_33.114 | 0.0003 | 0.0000 |
| Svi_33.192 | 0.0000 | 0.0000 |
| Svi_33.180 | 0.0000 | 0.0000 |
| Svi_33.196 | 0.0000 | 0.0000 |
| Svi_33.118 | 0.0000 | 0.0001 |
| Svi_6.155  | 0.0313 | 0.0008 |
| Svi_6.189  | 0.0014 | 0.0014 |
| Svi_6.186  | 0.0002 | 0.0000 |
| Svi_6.168  | 0.0101 | 0.0009 |
| Svi_6.200  | 0.0059 | 0.0001 |
| Svi_6.176  | 0.0008 | 0.0002 |
| Svi_6.204  | 0.0001 | 0.0001 |



|           |        |        |
|-----------|--------|--------|
| Svi_6.172 | 0.0147 | 0.0025 |
| Svi_6.195 | 0.0003 | 0.0100 |
| Svi_6.153 | 0.0052 | 0.0009 |
| Svi_6.159 | 0.0349 | 0.0003 |
| Svi_6.188 | 0.0220 | 0.0009 |
| Svi_6.157 | 0.0734 | 0.0000 |
| Svi_6.170 | 0.0112 | 0.0037 |
| Svi_6.191 | 0.0068 | 0.0043 |
| Svi_6.197 | 0.0002 | 0.0000 |
| Svi_6.193 | 0.0127 | 0.0016 |
| Svi_6.161 | 0.0005 | 0.0001 |
| Svi_6.178 | 0.0016 | 0.0000 |
| Svi_6.-9  | 0.0146 | 0.0121 |
| Svi_6.163 | 0.0001 | 0.0000 |
| Svi_6.180 | 0.0002 | 0.0000 |
| Svi_6.151 | 0.0000 | 0.0027 |
| Svi_6.128 | 0.0000 | 0.0000 |
| Svi_6.182 | 0.0000 | 0.0000 |
| Svi_6.166 | 0.0188 | 0.0001 |
| Svi_6.124 | 0.0000 | 0.0006 |
| Svi_6.199 | 0.0000 | 0.0001 |
| Svi_6.184 | 0.0000 | 0.0000 |
| Svi_6.174 | 0.0024 | 0.0009 |
| Svi_6.165 | 0.0000 | 0.0014 |
| Svi_6.149 | 0.0460 | 0.0033 |
| Svi_6.210 | 0.0004 | 0.0001 |
| Svi_6.202 | 0.0001 | 0.0003 |
| Svi_6.136 | 0.0001 | 0.0002 |
| Svi_6.145 | 0.0000 | 0.0000 |
| Svi_6.132 | 0.0001 | 0.0000 |
| Svi_6.207 | 0.0000 | 0.0001 |
| Svi_6.138 | 0.0000 | 0.0000 |
| Svi_6.212 | 0.0000 | 0.0000 |
| Svi_6.208 | 0.0000 | 0.0004 |
| Svi_6.143 | 0.0000 | 0.0001 |
| Mpf_4.215 | 0.0011 | 0.0004 |
| Mpf_4.217 | 0.0102 | 0.0099 |
| Mpf_4.223 | 0.0027 | 0.0165 |

|           |        |        |
|-----------|--------|--------|
| Mpf_4.191 | 0.0025 | 0.0064 |
| Mpf_4.206 | 0.0000 | 0.0000 |
| Mpf_4.189 | 0.0004 | 0.0018 |
| Mpf_4.225 | 0.0003 | 0.0006 |
| Mpf_4.214 | 0.0003 | 0.0123 |
| Mpf_4.219 | 0.0008 | 0.0068 |
| Mpf_4.212 | 0.0040 | 0.0000 |
| Mpf_4.221 | 0.0018 | 0.0014 |
| Mpf_4.210 | 0.0002 | 0.0008 |
| Mpf_4.193 | 0.0137 | 0.0011 |
| Mpf_4.208 | 0.0000 | 0.0002 |
| Mpf_4.231 | 0.0000 | 0.0002 |
| Mpf_4.-9  | 0.0003 | 0.0155 |
| Mpf_4.229 | 0.0004 | 0.0002 |
| Mpf_4.185 | 0.0000 | 0.0000 |
| Mpf_4.200 | 0.0000 | 0.0000 |
| Mpf_4.198 | 0.0003 | 0.0000 |
| Mpf_4.183 | 0.0000 | 0.0000 |
| Mpf_4.233 | 0.0003 | 0.0000 |
| Mpf_4.187 | 0.0012 | 0.0051 |
| Mpf_4.227 | 0.0001 | 0.0081 |
| Mpf_4.195 | 0.0001 | 0.0000 |
| Mpf_4.181 | 0.0007 | 0.0001 |
| Mpf_4.235 | 0.0000 | 0.0000 |
| Mpf_4.196 | 0.0000 | 0.0000 |
| Mpf_4.204 | 0.0003 | 0.0009 |
| Mpf_4.237 | 0.0000 | 0.0000 |
| Mpf_6.143 | 0.0041 | 0.0000 |
| Mpf_6.147 | 0.0038 | 0.0003 |
| Mpf_6.138 | 0.0000 | 0.0032 |
| Mpf_6.151 | 0.0005 | 0.0099 |
| Mpf_6.134 | 0.0002 | 0.0156 |
| Mpf_6.-9  | 0.0000 | 0.0103 |
| Mpf_6.156 | 0.0001 | 0.0002 |
| Mpf_6.160 | 0.0000 | 0.0000 |
| Mpf_6.122 | 0.0003 | 0.0062 |
| Mpf_6.130 | 0.0000 | 0.0000 |
| Mpf_6.118 | 0.0001 | 0.0000 |

## Supporting Figures

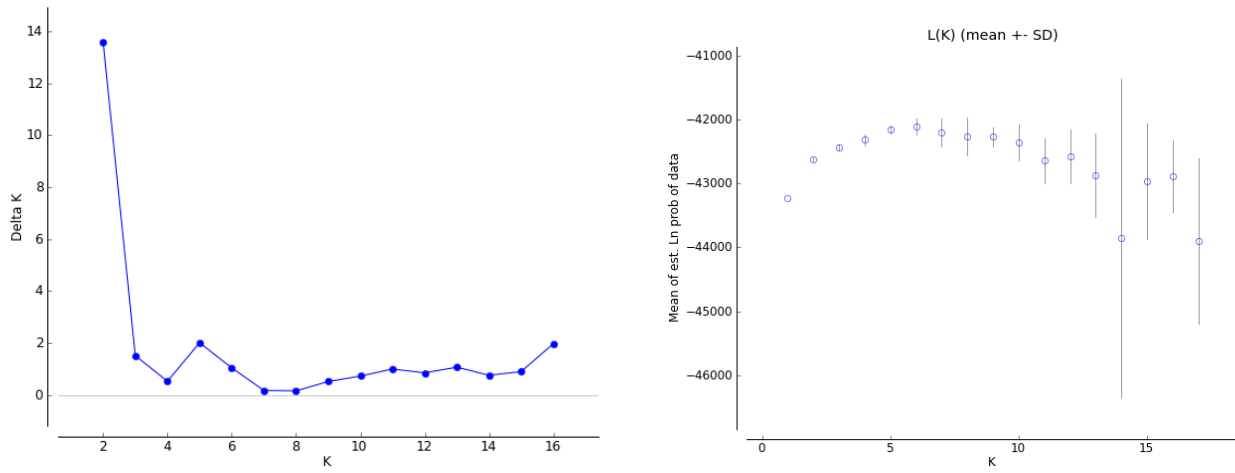

**Supplemental Figure S1.** Delta K and mean Ln(K) for each value of K (1-17) from STRUCTURE Harvester of STRUCTURE analysis on all yellow perch samples (Fig. 3A).

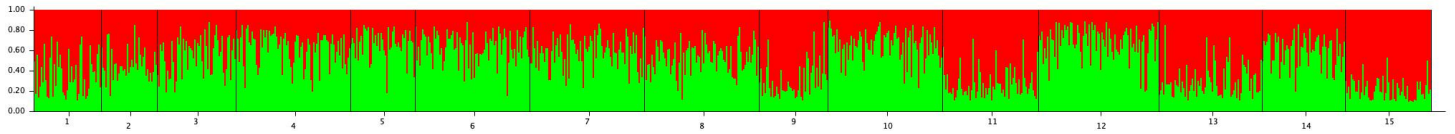

**Supplemental Figure S2.** STRUCTURE analysis on all yellow perch samples at  $K=2$  using no priors to inform the analysis. Populations are in same order as in Fig 3A.

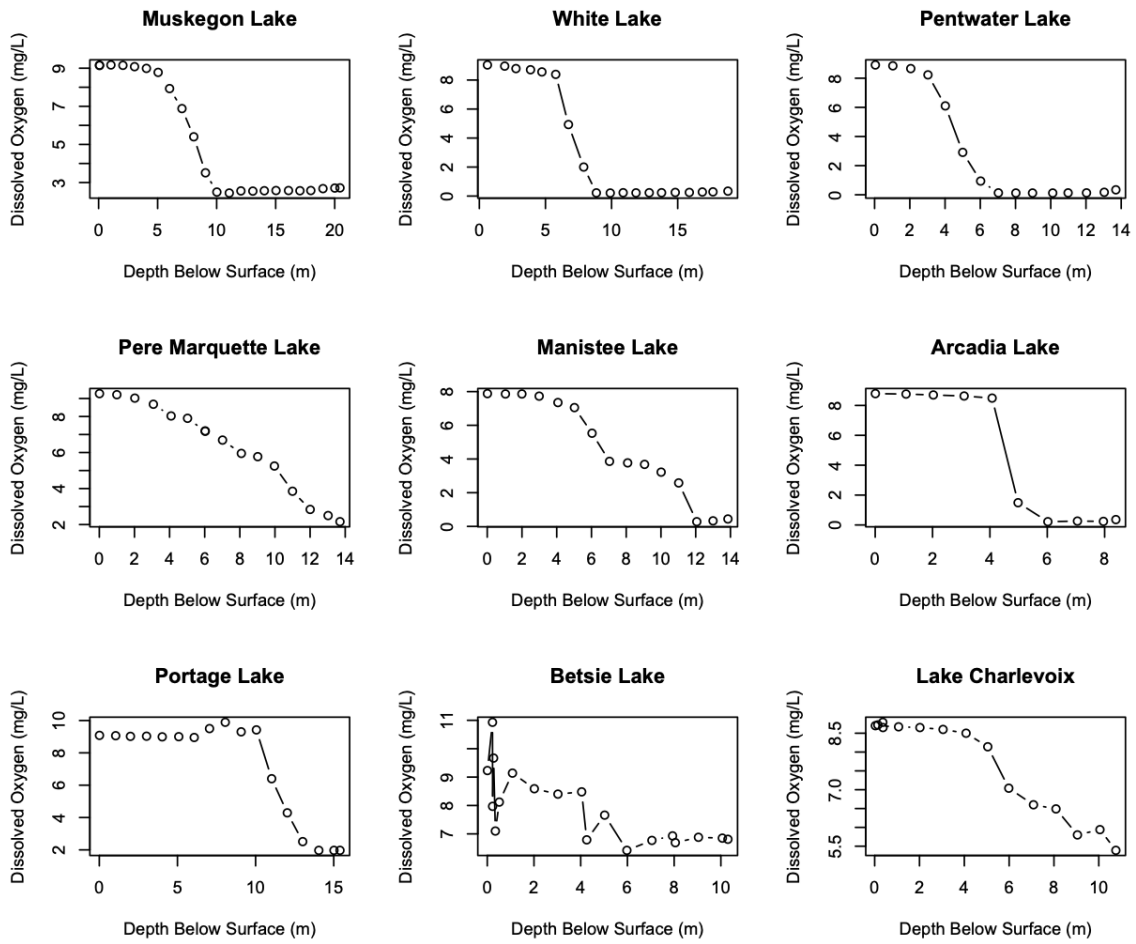

**Supplemental Figure S3.** Dissolved oxygen as a function of depth below the surface of nine DRM lakes in Summer 2015. Lakes arranged left to right and top to bottom in order of most southern to most northern lake. All lakes measured between 8/5 and 8/18/2015.
